# Supplementary material for: Characterization and Public Health Insights of the New Delhi Metallo-β-Lactamase-Producing Enterobacterales from Laying Hens in China
Source: MDPI journal article supplement (doi:10.3390/microorganisms10040800), 2022-04-11
Supplement: s1 [file s1]

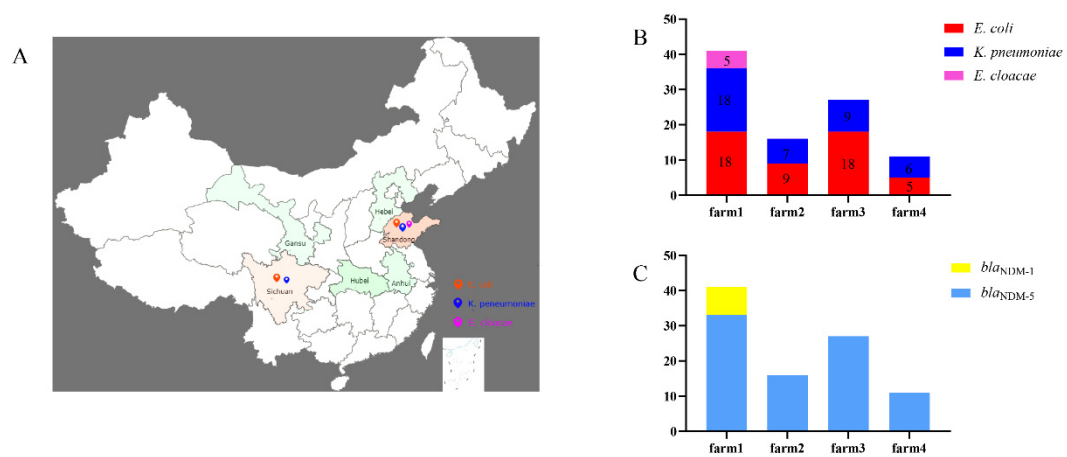

**Figure S1.** Distribution of NDM-producing *Enterobacteriaceae*. (A) Sample collection diagram of large-scale chicken farms. (B) Species identification and distribution results of *bla*<sub>NDM</sub>-carrying *Enterobacteriaceae*. (C) Type identification and distribution results of *bla*<sub>NDM</sub> genes.

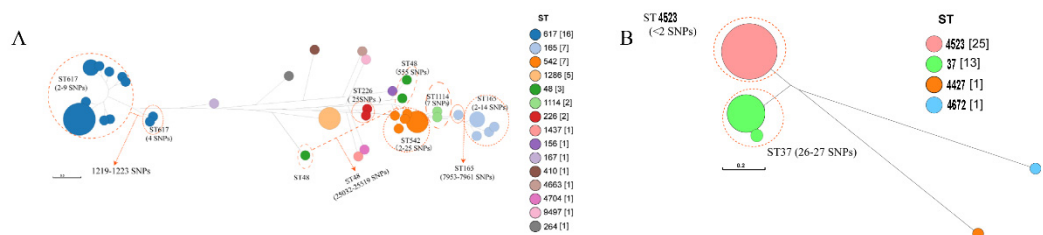

**Figure S2.** Phylogenetic trees of NDM-producing *Enterobacteriaceae*. (A) Phylogenetic trees of 50 NDM-producing *E. coli*. (B) Phylogenetic trees of 40 NDM-producing *K. pneumoniae*.

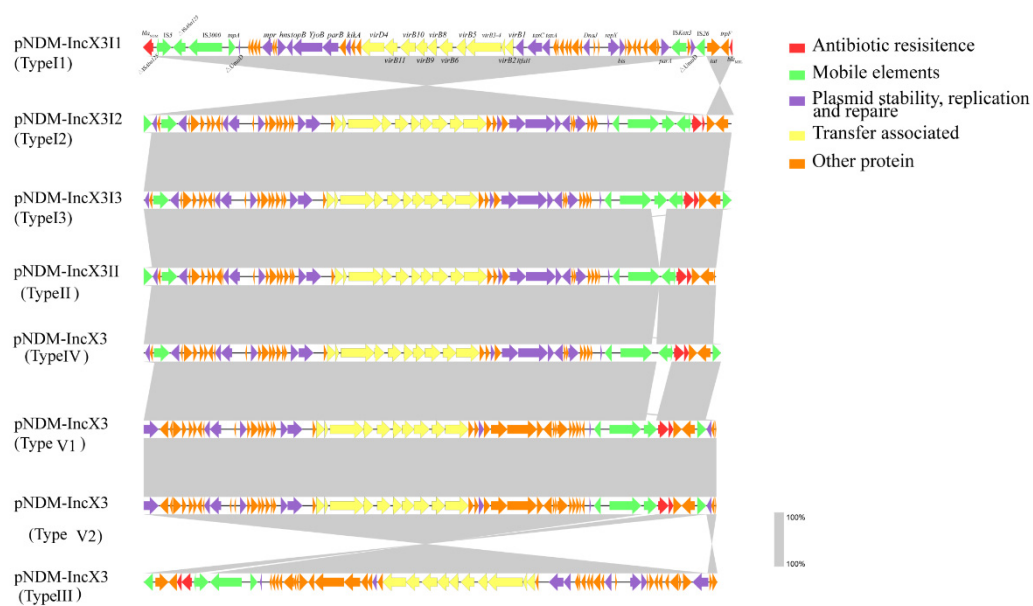

**Figure S3.** Comparison of genetic structure of *bla*<sub>NDM</sub>-IncX3 plasmids. The arrows marked the direction of gene transcription, and the gene categories were differentiated by colors. the homologous regions were marked by grey shading.

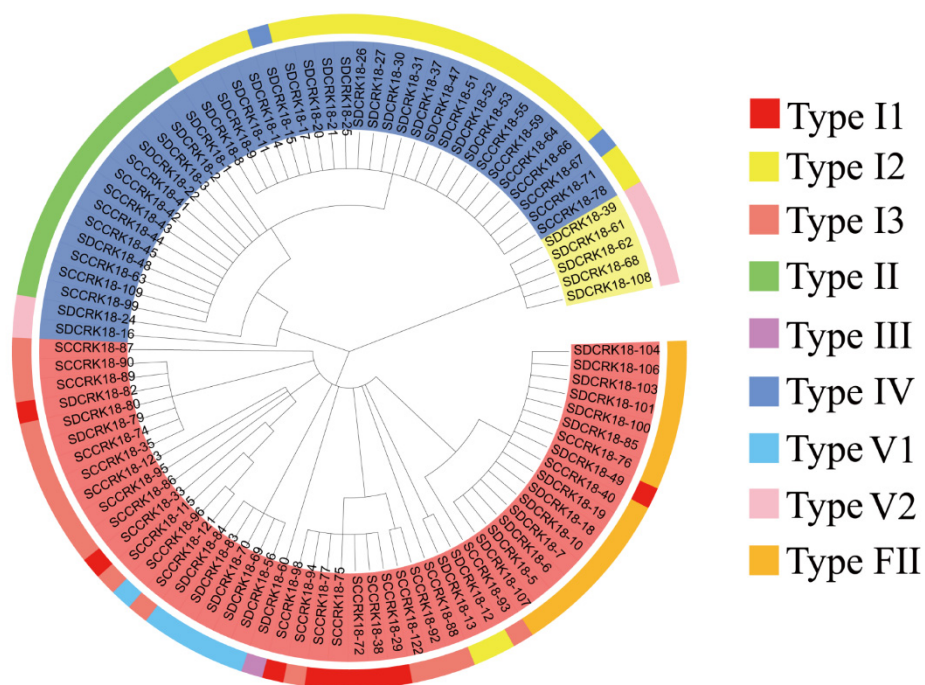

**Figure S4.** Distribution of 9 kinds of *bla*<sub>NDM</sub>-plasmids among 95 Gram negative bacteria. Species and plasmids were indicated by different colors.

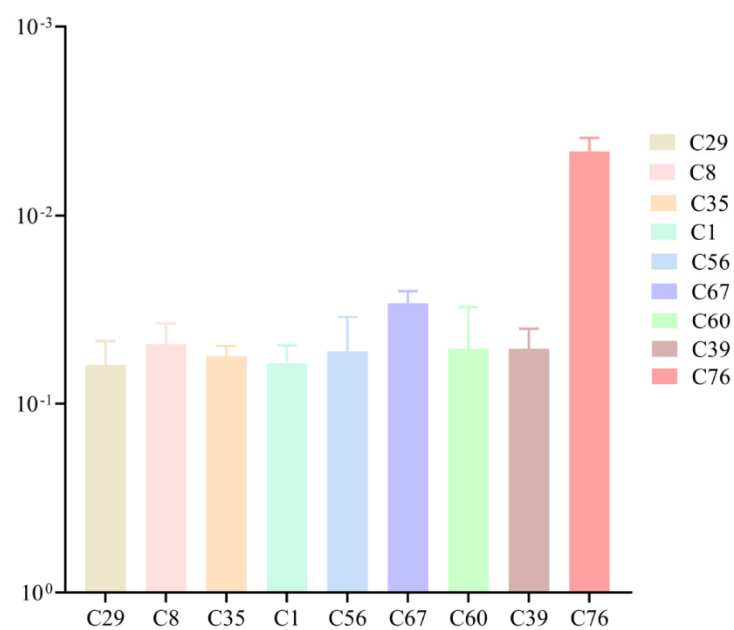

Figure S5. Transconjugative frequencies of *bla*<sub>NDM</sub>-IncX3 and *bla*<sub>NDM</sub>-IncF II plasmids.

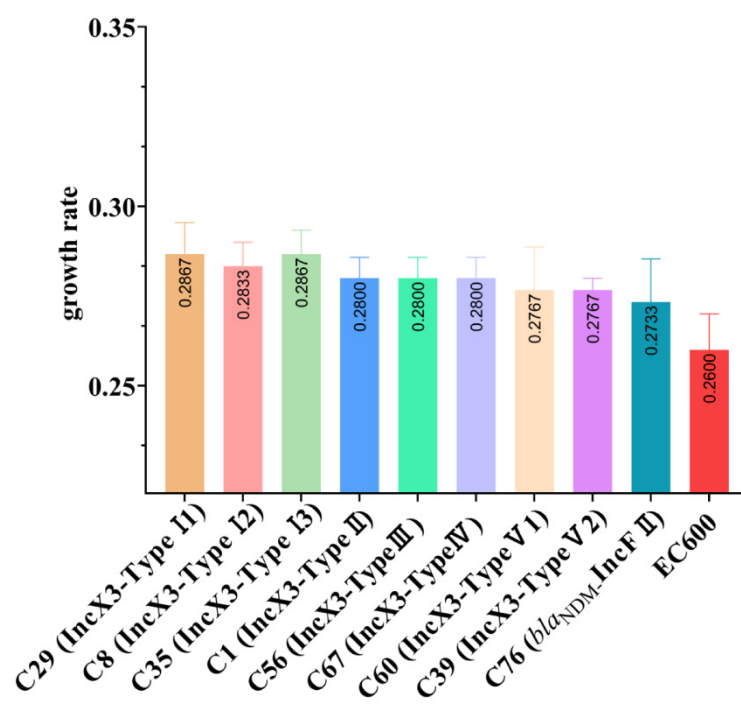

Figure S6. Growth rate of 9 kinds of transconjugants.

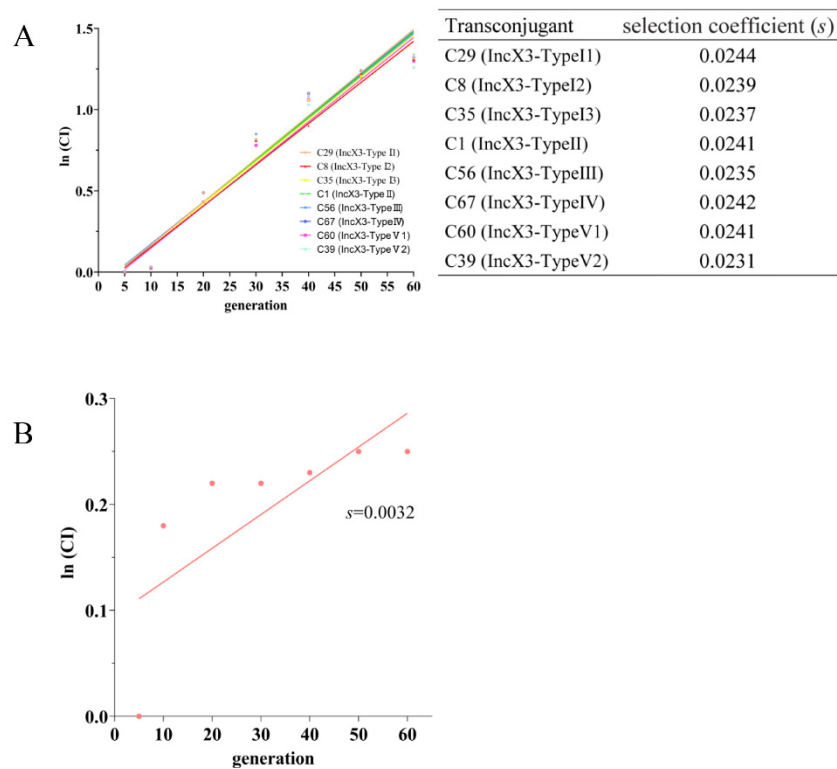

**Figure S7.** Selection coefficient of 9 kinds of transconjugants. (A) Selection coefficient of carrying *bla*<sub>NDM</sub>-IncX3 transconjugants. (B) Selection coefficient of carrying *bla*<sub>NDM</sub>-IncF II transconjugant.
