# Supplementary material for: Characterization and Public Health Insights of the New Delhi Metallo-β-Lactamase-Producing Enterobacterales from Laying Hens in China
Source: Microorganisms. 2022 Apr 11;10(4):800. doi: 10.3390/microorganisms10040800 (PMC9029685; doi:10.3390/microorganisms10040800)
Supplement: Supplementary file 1 [file microorganisms-10-00800-s001.zip › Supplemental_tables.xls]

## Sheet: Table S1
Strain_Name	Species	Farm	Phenotypes of antibiotic resistance
			IMP	MEM	CTX	CAZ	ATM	FOX	CIP	SXT	GEN	FFC	TE	TGC	FOS	PB
SDCRK18-1	Klebsiella pneumoniae	farm2	≧32	≧16	≧512	≧512	<0.25	≧32	≧64	≧128	≧64	≧64	≧128	<0.125	≧256	<0.25
SDCRK18-2	Klebsiella pneumoniae	farm1	≧32	≧16	≧512	≧512	<0.25	≧32	≧64	≧128	≧64	≧64	≧128	<0.125	≧256	<0.25
SDCRK18-3	Klebsiella pneumoniae	farm1	≧32	≧16	≧512	≧512	<0.25	≧32	≧64	≧128	≧64	≧64	≧128	<0.125	≧256	<0.25
SDCRK18-22	Klebsiella pneumoniae	farm1	≧32	≧16	≧512	≧512	<0.25	≧32	16	≧128	≧64	≧64	≧128	<0.125	≧256	<0.25
SCCRK18-41	Klebsiella pneumoniae	farm4	≧32	≧16	≧512	≧512	<0.25	≧32	32	≧128	≧64	≧64	≧128	<0.125	≧256	<0.25
SCCRK18-42	Klebsiella pneumoniae	farm4	≧32	≧16	≧512	≧512	<0.25	≧32	32	≧128	≧64	≧64	≧128	<0.125	≧256	<0.25
SCCRK18-43	Klebsiella pneumoniae	farm3	≧32	≧16	≧512	≧512	2	≧32	16	≧128	32	≧64	≧128	<0.125	≧256	<0.25
SCCRK18-44	Klebsiella pneumoniae	farm3	≧32	≧16	≧512	≧512	2	≧32	16	≧128	32	≧64	≧128	<0.125	≧256	<0.25
SCCRK18-45	Klebsiella pneumoniae	farm3	≧32	≧16	≧512	≧512	2	≧32	16	≧128	32	≧64	≧128	<0.125	≧256	<0.25
SDCRK18-48	Klebsiella pneumoniae	farm1	≧32	≧16	≧512	≧512	<0.25	≧32	≧64	≧128	≧64	≧64	≧128	<0.125	≧256	<0.25
SCCRK18-63	Klebsiella pneumoniae	farm3	≧32	≧16	≧512	≧512	<0.25	≧32	8	≧128	≧64	≧64	≧128	<0.125	≧256	<0.25
SCCRK18-99	Klebsiella pneumoniae	farm4	≧32	≧16	≧512	≧512	<0.25	≧32	32	≧128	≧64	≧64	≧128	<0.125	≧256	<0.25
SCCRK18-109	Klebsiella pneumoniae	farm4	≧32	≧16	≧512	≧512	<0.25	≧32	64	≧128	≧64	≧64	≧128	<0.125	≧256	<0.25
SDCRK18-8	Klebsiella pneumoniae	farm1	≧32	≧16	≧512	≧512	<0.25	≧32	<1	≧128	<1	≧64	≧128	<0.125	≧256	<0.25
SDCRK18-9	Klebsiella pneumoniae	farm1	≧32	≧16	≧512	≧512	<0.25	≧32	<1	≧128	<1	≧64	≧128	<0.125	≧256	<0.25
SDCRK18-11	Klebsiella pneumoniae	farm1	≧32	≧16	≧512	≧512	<0.25	≧32	<1	≧128	<1	≧64	≧128	<0.125	≧256	<0.25
SDCRK18-14	Klebsiella pneumoniae	farm1	≧32	≧16	≧512	≧512	<0.25	≧32	<1	≧128	<1	≧64	≧128	<0.125	≧256	<0.25
SDCRK18-15	Klebsiella pneumoniae	farm1	≧32	≧16	≧512	≧512	<0.25	≧32	2	≧128	<1	≧64	≧128	<0.125	≧256	<0.25
SDCRK18-17	Klebsiella pneumoniae	farm1	≧32	≧16	≧512	≧512	≧32	≧32	<1	≧128	<1	≧64	≧128	<0.125	≧256	<0.25
SDCRK18-20	Klebsiella pneumoniae	farm1	≧32	≧16	≧512	≧512	<0.25	≧32	<1	≧128	<1	≧64	≧128	<0.125	≧256	<0.25
SDCRK18-21	Klebsiella pneumoniae	farm1	≧32	≧16	≧512	≧512	<0.25	≧32	<1	≧128	<1	≧64	≧128	<0.125	≧256	<0.25
SDCRK18-25	Klebsiella pneumoniae	farm1	≧32	≧16	≧512	≧512	<0.25	≧32	<1	≧128	<1	≧64	≧128	<0.125	≧256	<0.25
SDCRK18-26	Klebsiella pneumoniae	farm1	≧32	≧16	≧512	≧512	<0.25	≧32	<1	≧128	<1	≧64	≧128	<0.125	≧256	<0.25
SDCRK18-27	Klebsiella pneumoniae	farm1	≧32	≧16	≧512	≧512	<0.25	≧32	<1	≧128	<1	≧64	≧128	<0.125	≧256	<0.25
SDCRK18-30	Klebsiella pneumoniae	farm1	≧32	≧16	≧512	≧512	<0.25	≧32	<1	≧128	4	≧64	≧128	<0.125	≧256	<0.25
SDCRK18-31	Klebsiella pneumoniae	farm2	≧32	≧16	≧512	≧512	<0.25	≧32	<1	≧128	<1	≧64	≧128	<0.125	≧256	<0.25
SDCRK18-37	Klebsiella pneumoniae	farm2	≧32	≧16	≧512	≧512	<0.25	≧32	8	≧128	<1	≧64	≧128	<0.125	≧256	<0.25
SDCRK18-47	Klebsiella pneumoniae	farm2	≧32	≧16	≧512	≧512	<0.25	≧32	<1	≧128	<1	≧64	≧128	<0.125	≧256	<0.25
SDCRK18-51	Klebsiella pneumoniae	farm2	≧32	≧16	≧512	≧512	<0.25	≧32	<1	≧128	<1	≧64	≧128	<0.125	≧256	<0.25
SDCRK18-52	Klebsiella pneumoniae	farm2	≧32	≧16	≧512	≧512	<0.25	≧32	<1	≧128	<1	≧64	≧128	<0.125	≧256	<0.25
SDCRK18-53	Klebsiella pneumoniae	farm2	≧32	≧16	≧512	≧512	<0.25	≧32	<1	≧128	4	≧64	≧128	<0.125	≧256	<0.25
SCCRK18-55	Klebsiella pneumoniae	farm3	≧32	≧16	≧512	≧512	<0.25	≧32	2	≧128	4	≧64	≧128	<0.125	≧256	<0.25
SCCRK18-59	Klebsiella pneumoniae	farm3	≧32	≧16	≧512	≧512	<0.25	≧32	16	≧128	2	≧64	≧128	<0.125	≧256	<0.25
SCCRK18-64	Klebsiella pneumoniae	farm3	≧32	≧16	≧512	≧512	<0.25	≧32	32	≧128	2	≧64	≧128	<0.125	≧256	<0.25
SCCRK18-66	Klebsiella pneumoniae	farm3	≧32	≧16	≧512	≧512	<0.25	≧32	2	≧128	<1	≧64	≧128	<0.125	≧256	<0.25
SCCRK18-67	Klebsiella pneumoniae	farm3	≧32	≧16	≧512	≧512	<0.25	≧32	<1	≧128	<1	≧64	≧128	<0.125	≧256	<0.25
SCCRK18-71	Klebsiella pneumoniae	farm4	≧32	≧16	≧512	≧512	<0.25	≧32	<1	≧128	<1	≧64	≧128	<0.125	≧256	<0.25
SCCRK18-78	Klebsiella pneumoniae	farm4	≧32	≧16	≧512	≧512	<0.25	≧32	<1	≧128	<1	≧64	≧128	<0.125	≧256	<0.25
SDCRK18-16	Klebsiella pneumoniae	farm1	≧32	≧16	≧512	≧512	<0.25	≧32	<1	≧128	<1	≧64	≧128	<0.125	≧256	<0.25
SDCRK18-24	Klebsiella pneumoniae	farm1	≧32	≧16	≧512	≧512	<0.25	≧32	<1	≧128	2	≧64	≧128	<0.125	≧256	<0.25
SDCRK18-5	Escherichia coli	farm1	≧32	≧16	≧512	≧512	<0.25	≧32	32	≧128	≧64	≧64	≧128	<0.125	≧256	4
SDCRK18-6	Escherichia coli	farm1	≧32	≧16	≧512	≧512	<0.25	≧32	32	≧128	≧64	≧64	≧128	<0.125	≧256	4
SDCRK18-7	Escherichia coli	farm1	≧32	≧16	≧512	≧512	<0.25	≧32	32	≧128	≧64	≧64	≧128	<0.125	≧256	4
SDCRK18-10	Escherichia coli	farm1	≧32	≧16	≧512	≧512	<0.25	≧32	32	≧128	≧64	≧64	≧128	<0.125	≧256	4
SDCRK18-18	Escherichia coli	farm1	≧32	≧16	≧512	≧512	<0.25	≧32	32	≧128	32	≧64	≧128	<0.125	≧256	4
SDCRK18-19	Escherichia coli	farm1	≧32	≧16	≧512	≧512	<0.25	≧32	32	≧128	32	≧64	≧128	<0.125	≧256	4
SDCRK18-40	Escherichia coli	farm1	≧32	≧16	≧512	≧512	<0.25	≧32	32	≧128	≧64	≧64	≧128	<0.125	≧256	4
SDCRK18-49	Escherichia coli	farm1	≧32	≧16	≧512	≧512	<0.25	≧32	32	≧128	≧64	≧64	≧128	<0.125	≧256	4
SDCRK18-76	Escherichia coli	farm2	≧32	≧16	≧512	≧512	<0.25	≧32	16	≧128	≧64	≧64	≧128	<0.125	≧256	4
SDCRK18-85	Escherichia coli	farm2	≧32	≧16	≧512	≧512	≧32	≧32	16	≧128	≧64	≧64	≧128	<0.125	≧256	4
SDCRK18-100	Escherichia coli	farm2	≧32	≧16	≧512	≧512	<0.25	≧32	32	≧128	≧64	≧64	≧128	<0.125	≧256	4
SDCRK18-101	Escherichia coli	farm2	≧32	≧16	≧512	≧512	<0.25	≧32	32	≧128	≧64	≧64	≧128	<0.125	≧256	4
SDCRK18-103	Escherichia coli	farm2	≧32	≧16	≧512	≧512	<0.25	≧32	32	≧128	≧64	≧64	≧128	<0.125	≧256	4
SDCRK18-104	Escherichia coli	farm2	≧32	≧16	≧512	≧512	<0.25	≧32	32	≧128	≧64	≧64	≧128	<0.125	≧256	4
SDCRK18-106	Escherichia coli	farm2	≧32	≧16	≧512	≧512	<0.25	≧32	16	≧128	≧64	≧64	≧128	<0.125	≧256	4
SDCRK18-107	Escherichia coli	farm1	≧32	≧16	≧512	≧512	<0.25	≧32	16	≧128	≧64	≧64	≧128	<0.125	≧256	<0.25
SDCRK18-12	Escherichia coli	farm1	≧32	≧16	≧512	≧512	1	≧32	32	≧128	16	<0.25	≧128	<0.125	≧256	4
SDCRK18-13	Escherichia coli	farm1	≧32	≧16	≧512	≧512	1	≧32	32	≧128	16	<0.25	≧128	<0.125	≧256	4
SCCRK18-29	Escherichia coli	farm3	≧32	≧16	≧512	≧512	≧32	≧32	32	≧128	<1	≧64	≧128	<0.125	<0.25	<0.25
SCCRK18-38	Escherichia coli	farm3	≧32	≧16	≧512	≧512	≧32	≧32	16	≧128	<1	≧64	≧128	<0.125	<0.25	<0.25
SCCRK18-72	Escherichia coli	farm3	≧32	≧16	≧512	≧512	≧32	≧32	32	≧128	<1	≧64	≧128	<0.125	<0.25	<0.25
SCCRK18-75	Escherichia coli	farm4	≧32	≧16	≧512	≧512	≧32	≧32	16	≧128	<1	≧64	≧128	<0.125	<0.25	<0.25
SCCRK18-77	Escherichia coli	farm4	≧32	≧16	≧512	≧512	≧32	≧32	32	≧128	<1	≧64	≧128	<0.125	<0.25	<0.25
SCCRK18-94	Escherichia coli	farm4	≧32	≧16	≧512	≧512	<0.25	≧32	16	≧128	8	≧64	≧128	<0.125	≧256	4
SCCRK18-98	Escherichia coli	farm3	≧32	≧16	≧512	≧512	≧32	≧32	32	≧128	<1	≧64	≧128	<0.125	<0.25	<0.25
SCCRK18-33	Escherichia coli	farm3	≧32	≧16	≧512	≧512	≧32	≧32	32	≧128	≧64	≧64	≧128	<0.125	≧256	<0.25
SCCRK18-35	Escherichia coli	farm3	≧32	≧16	≧512	≧512	<0.25	≧32	<1	≧128	<1	≧64	≧128	<0.125	≧256	4
SCCRK18-74	Escherichia coli	farm3	≧32	≧16	≧512	≧512	<0.25	≧32	<1	≧128	<1	≧64	≧128	<0.125	≧256	4
SDCRK18-79	Escherichia coli	farm1	≧32	≧16	≧512	≧512	8	≧32	<1	≧128	<1	≧64	≧128	<0.125	≧256	<0.25
SDCRK18-80	Escherichia coli	farm1	≧32	≧16	≧512	≧512	8	≧32	<1	≧128	<1	≧64	≧128	<0.125	≧256	<0.25
SDCRK18-82	Escherichia coli	farm1	≧32	≧16	≧512	≧512	<0.25	≧32	<1	≧128	<1	≧64	≧128	<0.125	≧256	<0.25
SCCRK18-89	Escherichia coli	farm4	≧32	≧16	≧512	≧512	≧32	≧32	<1	≧128	<1	≧64	≧128	<0.125	≧256	4
SCCRK18-90	Escherichia coli	farm3	≧32	≧16	≧512	≧512	8	≧32	<1	≧128	<1	≧64	≧128	<0.125	≧256	<0.25
SCCRK18-115	Escherichia coli	farm3	≧32	≧16	≧512	≧512	≧32	≧32	32	≧128	<1	≧64	≧128	<0.125	<0.25	<0.25
SCCRK18-88	Escherichia coli	farm3	≧32	≧16	≧512	≧512	<0.25	≧32	32	≧128	≧64	≧64	≧128	<0.125	<0.25	<0.25
SCCRK18-86	Escherichia coli	farm4	≧32	≧16	≧512	≧512	≧32	≧32	16	≧128	≧64	≧64	≧128	<0.125	<0.25	4
SCCRK18-95	Escherichia coli	farm3	≧32	≧16	≧512	≧512	16	≧32	32	≧128	≧64	≧64	≧128	<0.125	<0.25	4
SCCRK18-123	Escherichia coli	farm3	≧32	≧16	≧512	≧512	≧32	≧32	32	≧128	≧64	≧64	≧128	<0.125	<0.25	4
SCCRK18-96	Escherichia coli	farm3	≧32	≧16	≧512	≧512	16	≧32	32	≧128	≧64	≧64	≧128	<0.125	<0.25	4
SCCRK18-92	Escherichia coli	farm3	≧32	≧16	≧512	≧512	≧32	≧32	32	≧128	≧64	≧64	≧128	<0.125	<0.25	4
SCCRK18-122	Escherichia coli	farm3	≧32	≧16	≧512	≧512	<0.25	≧32	≧64	≧128	≧64	≧64	≧128	<0.125	<0.25	4
SCCRK18-121	Escherichia coli	farm3	≧32	≧16	≧512	≧512	≧32	≧32	<1	≧128	<1	≧64	≧128	<0.125	≧256	4
SDCRK18-60	Escherichia coli	farm1	≧32	≧16	≧512	≧512	<0.25	≧32	<1	≧128	<1	≧64	≧128	<0.125	<0.25	<0.25
SDCRK18-56	Escherichia coli	farm1	≧32	≧16	≧512	≧512	<0.25	≧32	≧64	≧128	≧64	≧64	≧128	<0.125	<0.25	<0.25
SDCRK18-69	Escherichia coli	farm1	≧32	≧16	≧512	≧512	<0.25	≧32	<1	≧128	≧64	≧64	≧128	<0.125	<0.25	<0.25
SDCRK18-70	Escherichia coli	farm1	≧32	≧16	≧512	≧512	<0.25	≧32	≧64	≧128	≧64	≧64	≧128	<0.125	<0.25	<0.25
SDCRK18-83	Escherichia coli	farm2	≧32	≧16	≧512	≧512	<0.25	≧32	32	≧128	≧64	≧64	≧128	<0.125	<0.25	<0.25
SDCRK18-84	Escherichia coli	farm2	≧32	≧16	≧512	≧512	<0.25	≧32	≧64	≧128	≧64	≧64	≧128	<0.125	<0.25	<0.25
SCCRK18-87	Escherichia coli	farm3	≧32	≧16	≧512	≧512	16	≧32	2	≧128	<1	≧64	≧128	<0.125	<0.25	4
SCCRK18-93	Escherichia coli	farm3	≧32	≧16	≧512	≧512	≧32	≧32	≧64	≧128	≧64	≧64	≧128	<0.125	<0.25	<0.25
SDCRK18-39	Enterobacter cloacae	farm1	≧32	≧16	≧512	≧512	<0.25	≧32	2	≧128	8	≧64	≧128	<0.125	≧256	<0.25
SDCRK18-61	Enterobacter cloacae	farm1	≧32	≧16	≧512	≧512	<0.25	≧32	2	≧128	8	≧64	≧128	<0.125	≧256	<0.25
SDCRK18-62	Enterobacter cloacae	farm1	≧32	≧16	≧512	≧512	<0.25	≧32	2	≧128	8	≧64	≧128	<0.125	≧256	<0.25
SDCRK18-68	Enterobacter cloacae	farm1	≧32	≧16	≧512	≧512	<0.25	≧32	2	≧128	8	≧64	≧128	<0.125	≧256	<0.25
SDCRK18-108	Enterobacter cloacae	farm1	≧32	≧16	≧512	≧512	<0.25	≧32	2	≧128	8	≧64	≧128	<0.125	≧256	<0.25
farm1 and farm2 are located in Jining City, Shandong Province, China; farm3 and farm4 are located in Mianyang City, Sichuan Province, China

## Sheet: Table S2
Strain_Name	Species	MLST	Types of NDM and location	Inc Groups / Plasmid types
				IncFIA(HI1)	IncFIB(K)	IncFIB(AP001918)	IncFIC(FII)	IncFII(K)	IncFII	IncHI2A	IncHI2	IncX1	IncX3	IncX4	IncR	IncN	IncI1	IncI2	IncQ1	IncA/C2	IncY
SDCRK18-1	Klebsiella pneumoniae	37	NDM-5/IncX3	＋	＋			＋		＋	＋		＋		＋
SDCRK18-2	Klebsiella pneumoniae	37	NDM-5/IncX3	＋	＋			＋		＋	＋		＋		＋
SDCRK18-3	Klebsiella pneumoniae	37	NDM-5/IncX3	＋	＋			＋		＋	＋		＋		＋
SDCRK18-22	Klebsiella pneumoniae	37	NDM-5/IncX3	＋	＋			＋		＋	＋		＋		＋
SCCRK18-41	Klebsiella pneumoniae	37	NDM-5/IncX3	＋	＋			＋		＋	＋		＋		＋
SCCRK18-42	Klebsiella pneumoniae	37	NDM-5/IncX3	＋	＋			＋		＋	＋		＋		＋
SCCRK18-43	Klebsiella pneumoniae	37	NDM-5/IncX3	＋	＋			＋		＋	＋		＋		＋
SCCRK18-44	Klebsiella pneumoniae	37	NDM-5/IncX3	＋	＋			＋		＋	＋		＋		＋
SCCRK18-45	Klebsiella pneumoniae	37	NDM-5/IncX3	＋	＋			＋		＋	＋		＋		＋
SDCRK18-48	Klebsiella pneumoniae	37	NDM-5/IncX3	＋	＋			＋		＋	＋		＋		＋
SCCRK18-63	Klebsiella pneumoniae	37	NDM-5/IncX3	＋	＋			＋		＋	＋		＋		＋
SCCRK18-99	Klebsiella pneumoniae	37	NDM-5/IncX3	＋	＋			＋		＋	＋		＋		＋
SCCRK18-109	Klebsiella pneumoniae	37	NDM-5/IncX3	＋	＋			＋		＋	＋		＋		＋
SDCRK18-8	Klebsiella pneumoniae	4523	NDM-5/IncX3										＋		＋	＋
SDCRK18-9	Klebsiella pneumoniae	4523	NDM-5/IncX3										＋		＋
SDCRK18-11	Klebsiella pneumoniae	4523	NDM-5/IncX3										＋		＋	＋
SDCRK18-14	Klebsiella pneumoniae	4523	NDM-5/IncX3										＋		＋	＋
SDCRK18-15	Klebsiella pneumoniae	4523	NDM-5/IncX3										＋		＋	＋
SDCRK18-17	Klebsiella pneumoniae	4523	NDM-5/IncX3										＋		＋	＋
SDCRK18-20	Klebsiella pneumoniae	4523	NDM-5/IncX3										＋		＋	＋
SDCRK18-21	Klebsiella pneumoniae	4523	NDM-5/IncX3										＋		＋	＋
SDCRK18-25	Klebsiella pneumoniae	4523	NDM-5/IncX3										＋		＋	＋
SDCRK18-26	Klebsiella pneumoniae	4523	NDM-5/IncX3										＋		＋	＋
SDCRK18-27	Klebsiella pneumoniae	4523	NDM-5/IncX3										＋		＋	＋
SDCRK18-30	Klebsiella pneumoniae	4523	NDM-5/IncX3										＋		＋	＋
SDCRK18-31	Klebsiella pneumoniae	4523	NDM-5/IncX3										＋		＋	＋
SDCRK18-37	Klebsiella pneumoniae	4523	NDM-5/IncX3								＋		＋		＋	＋
SDCRK18-47	Klebsiella pneumoniae	4523	NDM-5/IncX3										＋		＋	＋
SDCRK18-51	Klebsiella pneumoniae	4523	NDM-5/IncX3										＋		＋	＋
SDCRK18-52	Klebsiella pneumoniae	4523	NDM-5/IncX3										＋		＋	＋
SDCRK18-53	Klebsiella pneumoniae	4523	NDM-5/IncX3										＋		＋	＋
SCCRK18-55	Klebsiella pneumoniae	4523	NDM-5/IncX3										＋		＋
SCCRK18-59	Klebsiella pneumoniae	4523	NDM-5/IncX3										＋		＋	＋
SCCRK18-64	Klebsiella pneumoniae	4523	NDM-5/IncX3										＋		＋	＋
SCCRK18-66	Klebsiella pneumoniae	4523	NDM-5/IncX3										＋		＋	＋
SCCRK18-67	Klebsiella pneumoniae	4523	NDM-5/IncX3										＋		＋	＋
SCCRK18-71	Klebsiella pneumoniae	4523	NDM-5/IncX3										＋		＋	＋
SCCRK18-78	Klebsiella pneumoniae	4523	NDM-5/IncX3										＋		＋	＋
SDCRK18-16	Klebsiella pneumoniae	4427	NDM-1/IncX3										＋		＋	＋
SDCRK18-24	Klebsiella pneumoniae	4672	NDM-1/IncX3								＋		＋		＋	＋
SDCRK18-5	Escherichia coli	617	NDM-5/IncFII						＋			＋			＋			＋
SDCRK18-6	Escherichia coli	617	NDM-5/IncFII						＋			＋			＋			＋
SDCRK18-7	Escherichia coli	617	NDM-5/IncFII						＋			＋			＋			＋
SDCRK18-10	Escherichia coli	617	NDM-5/IncFII						＋			＋			＋			＋
SDCRK18-18	Escherichia coli	617	NDM-5/IncFII						＋			＋			＋			＋
SDCRK18-19	Escherichia coli	617	NDM-5/IncFII						＋			＋			＋			＋
SDCRK18-40	Escherichia coli	617	NDM-5/IncFII						＋			＋			＋			＋
SDCRK18-49	Escherichia coli	617	NDM-5/IncX3										＋		＋
SDCRK18-76	Escherichia coli	617	NDM-5/IncFII						＋			＋			＋			＋
SDCRK18-85	Escherichia coli	617	NDM-5/IncFII						＋			＋			＋			＋
SDCRK18-100	Escherichia coli	617	NDM-5/IncFII						＋			＋			＋			＋
SDCRK18-101	Escherichia coli	617	NDM-5/IncFII						＋			＋			＋			＋
SDCRK18-103	Escherichia coli	617	NDM-5/IncFII						＋			＋			＋			＋
SDCRK18-104	Escherichia coli	617	NDM-5/IncFII						＋			＋			＋			＋
SDCRK18-106	Escherichia coli	617	NDM-5/IncFII						＋			＋			＋			＋
SDCRK18-107	Escherichia coli	617	NDM-5/IncFII										＋		＋
SDCRK18-12	Escherichia coli	226	NDM-5/IncX3							＋	＋		＋			＋			＋
SDCRK18-13	Escherichia coli	226	NDM-5/IncX3							＋	＋		＋			＋			＋
SCCRK18-29	Escherichia coli	165	NDM-5/IncX3		＋								＋
SCCRK18-38	Escherichia coli	165	NDM-5/IncX3		＋								＋
SCCRK18-72	Escherichia coli	165	NDM-5/IncX3		＋								＋
SCCRK18-75	Escherichia coli	165	NDM-5/IncX3		＋								＋
SCCRK18-77	Escherichia coli	165	NDM-5/IncX3		＋								＋
SCCRK18-94	Escherichia coli	165	NDM-5/IncX3							＋	＋		＋						＋
SCCRK18-98	Escherichia coli	165	NDM-5/IncX3		＋								＋
SCCRK18-33	Escherichia coli	9497	NDM-5/IncX3			＋						＋		＋			＋		＋
SCCRK18-35	Escherichia coli	542	NDM-5/IncX3	＋	＋	＋	＋			＋	＋		＋
SCCRK18-74	Escherichia coli	542	NDM-5/IncX3	＋	＋	＋	＋			＋	＋		＋
SDCRK18-79	Escherichia coli	542	NDM-5/IncX3	＋	＋	＋	＋			＋	＋		＋
SDCRK18-80	Escherichia coli	542	NDM-5/IncX3	＋	＋	＋	＋			＋	＋		＋
SDCRK18-82	Escherichia coli	542	NDM-5/IncX3	＋	＋	＋	＋			＋	＋		＋
SCCRK18-89	Escherichia coli	542	NDM-5/IncX3	＋	＋					＋	＋		＋				＋
SCCRK18-90	Escherichia coli	542	NDM-5/IncX3	＋	＋					＋	＋		＋
SCCRK18-115	Escherichia coli	410	NDM-5/IncX3			＋	＋					＋	＋							＋
SCCRK18-88	Escherichia coli	1437	NDM-5/IncX3			＋	＋						＋
SCCRK18-86	Escherichia coli	48	NDM-5/IncX3	＋	＋	＋				＋	＋		＋
SCCRK18-95	Escherichia coli	48	NDM-5/IncX3										＋		＋
SCCRK18-123	Escherichia coli	48	NDM-5/IncX3							＋	＋	＋	＋	＋					＋
SCCRK18-96	Escherichia coli	4663	NDM-5/IncX3	＋	＋								＋	＋						＋	＋
SCCRK18-92	Escherichia coli	1114	NDM-5/IncX3									＋	＋	＋
SCCRK18-122	Escherichia coli	1114	NDM-5/IncX3									＋	＋	＋
SCCRK18-121	Escherichia coli	156	NDM-5/IncX3									＋	＋	＋
SDCRK18-60	Escherichia coli	4704	NDM-1/IncX3									＋	＋		＋
SDCRK18-56	Escherichia coli	1286	NDM-5/IncX3						＋			＋	＋				＋		＋
SDCRK18-69	Escherichia coli	1286	NDM-5/IncX3						＋			＋	＋				＋		＋
SDCRK18-70	Escherichia coli	1286	NDM-5/IncX3						＋			＋	＋				＋		＋
SDCRK18-83	Escherichia coli	1286	NDM-5/IncX3						＋			＋	＋				＋		＋
SDCRK18-84	Escherichia coli	1286	NDM-5/IncX3						＋			＋	＋				＋		＋
SCCRK18-87	Escherichia coli	264	NDM-5/IncX3	＋	＋								＋	＋						＋	＋
SCCRK18-93	Escherichia coli	167	NDM-5/IncX3	＋		＋		＋	＋				＋				＋
SDCRK18-39	Enterobacter cloacae	51	NDM-1/IncX3										＋					＋
SDCRK18-61	Enterobacter cloacae	51	NDM-1/IncX3										＋					＋
SDCRK18-62	Enterobacter cloacae	51	NDM-1/IncX3										＋					＋
SDCRK18-68	Enterobacter cloacae	51	NDM-1/IncX3										＋					＋
SDCRK18-108	Enterobacter cloacae	51	NDM-1/IncX3										＋					＋

## Sheet: Table S3
NCBI accession numbers of 95 blaNDM gene carrying Gram-negative bacteria
Strain_Name	Species	Farm	platform	instrument_model	Bioproject_accession	Biosample_accession
SDCRK18-1	K. pneumoniae	farm2	ILLUMINA	HiSeq 2000	PRJNA597144	SAMN13648562
SDCRK18-2	K. pneumoniae	farm1	ILLUMINA	HiSeq 2000	PRJNA597144	SAMN13648563
SDCRK18-3	K. pneumoniae	farm1	ILLUMINA	HiSeq 2000	PRJNA597144	SAMN13648564
SDCRK18-22	K. pneumoniae	farm1	ILLUMINA	HiSeq 2000	PRJNA597144	SAMN13648565
SCCRK18-41	K. pneumoniae	farm4	ILLUMINA	HiSeq 2000	PRJNA597144	SAMN13648566
SCCRK18-42	K. pneumoniae	farm4	ILLUMINA	HiSeq 2000	PRJNA597144	SAMN13648567
SCCRK18-43	K. pneumoniae	farm3	ILLUMINA	HiSeq 2000	PRJNA597144	SAMN13648568
SCCRK18-44	K. pneumoniae	farm3	ILLUMINA	HiSeq 2000	PRJNA597144	SAMN13648569
SCCRK18-45	K. pneumoniae	farm3	ILLUMINA	HiSeq 2000	PRJNA597144	SAMN13648570
SDCRK18-48	K. pneumoniae	farm1	ILLUMINA	HiSeq 2000	PRJNA597144	SAMN13648571
SCCRK18-63	K. pneumoniae	farm3	ILLUMINA	HiSeq 2000	PRJNA597144	SAMN13648572
SCCRK18-99	K. pneumoniae	farm4	ILLUMINA	HiSeq 2000	PRJNA597144	SAMN13648573
SCCRK18-109	K. pneumoniae	farm4	ILLUMINA	HiSeq 2000	PRJNA597144	SAMN13648574
SDCRK18-8	K. pneumoniae	farm1	ILLUMINA	HiSeq 2000	PRJNA597144	SAMN13648575
SDCRK18-9	K. pneumoniae	farm1	ILLUMINA	HiSeq 2000	PRJNA597144	SAMN13648576
SDCRK18-11	K. pneumoniae	farm1	ILLUMINA	HiSeq 2000	PRJNA597144	SAMN13648577
SDCRK18-14	K. pneumoniae	farm1	ILLUMINA	HiSeq 2000	PRJNA597144	SAMN13648578
SDCRK18-15	K. pneumoniae	farm1	ILLUMINA	HiSeq 2000	PRJNA597144	SAMN13648579
SDCRK18-17	K. pneumoniae	farm1	ILLUMINA	HiSeq 2000	PRJNA597144	SAMN13648580
SDCRK18-20	K. pneumoniae	farm1	ILLUMINA	HiSeq 2000	PRJNA597144	SAMN13648581
SDCRK18-21	K. pneumoniae	farm1	ILLUMINA	HiSeq 2000	PRJNA597144	SAMN13648582
SDCRK18-25	K. pneumoniae	farm1	ILLUMINA	HiSeq 2000	PRJNA597144	SAMN13648583
SDCRK18-26	K. pneumoniae	farm1	ILLUMINA	HiSeq 2000	PRJNA597144	SAMN13648584
SDCRK18-27	K. pneumoniae	farm1	ILLUMINA	HiSeq 2000	PRJNA597144	SAMN13648585
SDCRK18-30	K. pneumoniae	farm1	ILLUMINA	HiSeq 2000	PRJNA597144	SAMN13648586
SDCRK18-31	K. pneumoniae	farm2	ILLUMINA	HiSeq 2000	PRJNA597144	SAMN13648587
SDCRK18-37	K. pneumoniae	farm2	ILLUMINA	HiSeq 2000	PRJNA597144	SAMN13648588
SDCRK18-47	K. pneumoniae	farm2	ILLUMINA	HiSeq 2000	PRJNA597144	SAMN13648589
SDCRK18-51	K. pneumoniae	farm2	ILLUMINA	HiSeq 2000	PRJNA597144	SAMN13648590
SDCRK18-52	K. pneumoniae	farm2	ILLUMINA	HiSeq 2000	PRJNA597144	SAMN13648591
SDCRK18-53	K. pneumoniae	farm2	ILLUMINA	HiSeq 2000	PRJNA597144	SAMN13648592
SCCRK18-55	K. pneumoniae	farm3	ILLUMINA	HiSeq 2000	PRJNA597144	SAMN13648593
SCCRK18-59	K. pneumoniae	farm3	ILLUMINA	HiSeq 2000	PRJNA597144	SAMN13648594
SCCRK18-64	K. pneumoniae	farm3	ILLUMINA	HiSeq 2000	PRJNA597144	SAMN13648596
SCCRK18-66	K. pneumoniae	farm3	ILLUMINA	HiSeq 2000	PRJNA597144	SAMN13648596
SCCRK18-67	K. pneumoniae	farm3	ILLUMINA	HiSeq 2000	PRJNA597144	SAMN13648597
SCCRK18-71	K. pneumoniae	farm4	ILLUMINA	HiSeq 2000	PRJNA597144	SAMN13648598
SCCRK18-78	K. pneumoniae	farm4	ILLUMINA	HiSeq 2000	PRJNA597144	SAMN13648599
SDCRK18-16	K. pneumoniae	farm1	ILLUMINA	HiSeq 2000	PRJNA597144	SAMN13648600
SDCRK18-24	K. pneumoniae	farm1	ILLUMINA	HiSeq 2000	PRJNA597144	SAMN13648601
SDCRK18-5	E. coli	farm1	ILLUMINA	HiSeq 2000	PRJNA637815	SAMN15158831
SDCRK18-6	E. coli	farm1	ILLUMINA	HiSeq 2000	PRJNA637815	SAMN15158832
SDCRK18-7	E. coli	farm1	ILLUMINA	HiSeq 2000	PRJNA637815	SAMN15158833
SDCRK18-10	E. coli	farm1	ILLUMINA	HiSeq 2000	PRJNA637815	SAMN15158834
SDCRK18-18	E. coli	farm1	ILLUMINA	HiSeq 2000	PRJNA637815	SAMN15158835
SDCRK18-19	E. coli	farm1	ILLUMINA	HiSeq 2000	PRJNA637815	SAMN15158836
SDCRK18-40	E. coli	farm1	ILLUMINA	HiSeq 2000	PRJNA637815	SAMN15158837
SDCRK18-49	E. coli	farm1	ILLUMINA	HiSeq 2000	PRJNA637815	SAMN15158838
SDCRK18-76	E. coli	farm2	ILLUMINA	HiSeq 2000	PRJNA637815	SAMN15158839
SDCRK18-85	E. coli	farm2	ILLUMINA	HiSeq 2000	PRJNA637815	SAMN15158840
SDCRK18-100	E. coli	farm2	ILLUMINA	HiSeq 2000	PRJNA637815	SAMN15158841
SDCRK18-101	E. coli	farm2	ILLUMINA	HiSeq 2000	PRJNA637815	SAMN15158842
SDCRK18-103	E. coli	farm2	ILLUMINA	HiSeq 2000	PRJNA637815	SAMN15158843
SDCRK18-104	E. coli	farm2	ILLUMINA	HiSeq 2000	PRJNA637815	SAMN15158844
SDCRK18-106	E. coli	farm2	ILLUMINA	HiSeq 2000	PRJNA637815	SAMN15158845
SDCRK18-107	E. coli	farm1	ILLUMINA	HiSeq 2000	PRJNA637815	SAMN15158846
SDCRK18-12	E. coli	farm1	ILLUMINA	HiSeq 2000	PRJNA637815	SAMN15158847
SDCRK18-13	E. coli	farm1	ILLUMINA	HiSeq 2000	PRJNA637815	SAMN15158848
SCCRK18-29	E. coli	farm3	ILLUMINA	HiSeq 2000	PRJNA637815	SAMN15158849
SCCRK18-38	E. coli	farm3	ILLUMINA	HiSeq 2000	PRJNA637815	SAMN15158850
SCCRK18-72	E. coli	farm3	ILLUMINA	HiSeq 2000	PRJNA637815	SAMN15158851
SCCRK18-75	E. coli	farm4	ILLUMINA	HiSeq 2000	PRJNA637815	SAMN15158852
SCCRK18-77	E. coli	farm4	ILLUMINA	HiSeq 2000	PRJNA637815	SAMN15158853
SCCRK18-94	E. coli	farm4	ILLUMINA	HiSeq 2000	PRJNA637815	SAMN15158854
SCCRK18-98	E. coli	farm3	ILLUMINA	HiSeq 2000	PRJNA637815	SAMN15158855
SCCRK18-33	E. coli	farm3	ILLUMINA	HiSeq 2000	PRJNA637815	SAMN15158856
SCCRK18-35	E. coli	farm3	ILLUMINA	HiSeq 2000	PRJNA637815	SAMN15158857
SCCRK18-74	E. coli	farm3	ILLUMINA	HiSeq 2000	PRJNA637815	SAMN15158858
SDCRK18-79	E. coli	farm1	ILLUMINA	HiSeq 2000	PRJNA637815	SAMN15158859
SDCRK18-80	E. coli	farm1	ILLUMINA	HiSeq 2000	PRJNA637815	SAMN15158860
SDCRK18-82	E. coli	farm1	ILLUMINA	HiSeq 2000	PRJNA637815	SAMN15158861
SCCRK18-89	E. coli	farm4	ILLUMINA	HiSeq 2000	PRJNA637815	SAMN15158862
SCCRK18-90	E. coli	farm3	ILLUMINA	HiSeq 2000	PRJNA637815	SAMN15158863
SCCRK18-115	E. coli	farm3	ILLUMINA	HiSeq 2000	PRJNA637815	SAMN15158864
SCCRK18-88	E. coli	farm3	ILLUMINA	HiSeq 2000	PRJNA637815	SAMN15158865
SCCRK18-86	E. coli	farm4	ILLUMINA	HiSeq 2000	PRJNA637815	SAMN15158866
SCCRK18-96	E. coli	farm3	ILLUMINA	HiSeq 2000	PRJNA637815	SAMN15158867
SCCRK18-123	E. coli	farm3	ILLUMINA	HiSeq 2000	PRJNA637815	SAMN15158868
SCCRK18-96	E. coli	farm3	ILLUMINA	HiSeq 2000	PRJNA637815	SAMN15158869
SCCRK18-92	E. coli	farm3	ILLUMINA	HiSeq 2000	PRJNA637815	SAMN15158870
SCCRK18-122	E. coli	farm3	ILLUMINA	HiSeq 2000	PRJNA637815	SAMN15158873
SCCRK18-121	E. coli	farm3	ILLUMINA	HiSeq 2000	PRJNA637815	SAMN15158874
SDCRK18-60	E. coli	farm1	ILLUMINA	HiSeq 2000	PRJNA637815	SAMN15158875
SDCRK18-56	E. coli	farm1	ILLUMINA	HiSeq 2000	PRJNA637815	SAMN15158876
SDCRK18-69	E. coli	farm1	ILLUMINA	HiSeq 2000	PRJNA637815	SAMN15158877
SDCRK18-70	E. coli	farm1	ILLUMINA	HiSeq 2000	PRJNA637815	SAMN15158878
SDCRK18-83	E. coli	farm2	ILLUMINA	HiSeq 2000	PRJNA637815	SAMN15158879
SDCRK18-84	E. coli	farm2	ILLUMINA	HiSeq 2000	PRJNA637815	SAMN15158880
SCCRK18-87	E. coli	farm3	ILLUMINA	HiSeq 2000	PRJNA637815	SAMN15158881
SCCRK18-93	E. coli	farm3	ILLUMINA	HiSeq 2000	PRJNA637815	SAMN15158882
SDCRK18-39	E. cloacae	farm1	ILLUMINA	HiSeq 2000	PRJNA642323	SAMN15393911
SDCRK18-61	E. cloacae	farm1	ILLUMINA	HiSeq 2000	PRJNA642323	SAMN15393912
SDCRK18-62	E. cloacae	farm1	ILLUMINA	HiSeq 2000	PRJNA642323	SAMN15393913
SDCRK18-68	E. cloacae	farm1	ILLUMINA	HiSeq 2000	PRJNA642323	SAMN15393914
SDCRK18-108	E. cloacae	farm1	ILLUMINA	HiSeq 2000	PRJNA642323	SAMN15393915

## Sheet: Table S4
GeneBank accession numbers of blaNDM gene carrying plasmids
Plasmid	types	Accession number of plasmid	Size(bp)
IncX3	TypeⅠ1	MN565271	46161
IncFⅡ	FⅡ	MN641485	80348
